# Supplementary material
Source: ML conference proceedings conference paper supplement (https://openaccess.thecvf.com/content/CVPR_2019/html/Heim_Constrained_Generative_Adversarial_CVPR_2019_paper.html)
Supplement: Supplementary file 1 [file Heim_Constrained_Generative_Adversarial_CVPR_2019_supplemental.pdf]

# Supplement: Constrained Generative Adversarial Networks for Interactive Image Generation

Eric Heim  
Air Force Research Laboratory  
Information Directorate  
Rome, NY USA  
eric.heim.1@us.af.mil

## 1. Formal Definition of LSTM Component

Equation (4) is a standard LSTM cell:

$$\begin{aligned} LSTM(\mathbf{z}, \mathbf{q}_{t-1}^*) &= \mathbf{o}_t * \tanh(\mathbf{h}_t), \text{ where} \\ \mathbf{o}_t &= \sigma(\mathbf{w}_o \cdot [\mathbf{q}_{t-1}^*, \mathbf{z}] + \mathbf{b}_o) \\ \mathbf{h}_t &= \mathbf{f}_t * \mathbf{h}_{t-1} + \mathbf{i}_t * \tilde{\mathbf{h}}_t \\ \mathbf{f}_t &= \sigma(\mathbf{w}_f \cdot [\mathbf{q}_{t-1}^*, \mathbf{z}] + \mathbf{b}_f) \\ \mathbf{i}_t &= \sigma(\mathbf{w}_i \cdot [\mathbf{q}_{t-1}^*, \mathbf{z}] + \mathbf{b}_i) \\ \tilde{\mathbf{h}}_t &= \tanh(\mathbf{w}_h \cdot [\mathbf{q}_{t-1}^*, \mathbf{z}] + \mathbf{b}_h) \end{aligned}$$

Here,  $\mathbf{z}$  is used as what is commonly referred to as “input” to the LSTM,  $\mathbf{q}_{t-1}^*$  is commonly called the “hidden state” of the previous iteration, and  $LSTM$  returns the hidden state of the current iteration.

## 2. Neural Network Architectures used in Experiments

In this section, we outline the neural network architecture used in all experiments in the main paper, layer by layer. Rows of the network in descending order (top to bottom) indicate layers from input to output. The following naming conventions are used throughout. “Conv” indicates a convolutional layer, “FC” indicates a fully connected layer, and “TConv” indicates a transpose convolutional layer. The column labeled “Ker” indicates the kernel size, “Str” indicates stride, and “Act” indicates the activation function used. Columns labeled “In” and “Out” indicate the shape of the input to the layer and shape of the output of the layer.

### 2.1. MNIST Experiments

Below you will find architecture descriptions for the networks used in the MNIST experiments. Note that after each two convolutional or transpose convolutional layers in all networks, layer normalization is used.

| $\phi$ Network (Encoder) |         |     |     |      |         |
|--------------------------|---------|-----|-----|------|---------|
| Layer                    | In      | Ker | Str | Act  | Out     |
| Conv                     | 32x32x1 | 3x3 | 1   | ReLU | 32x32x4 |
| Conv                     | 32x32x4 | 3x3 | 2   | ReLU | 16x16x8 |
| Conv                     | 16x16x8 | 3x3 | 2   | ReLU | 8x8x16  |
| Conv                     | 8x8x16  | 3x3 | 2   | ReLU | 4x4x32  |
| Conv                     | 4x4x32  | 3x3 | 2   | ReLU | 2x2x64  |
| FC                       | 2x2x64  |     |     | None | 2       |

| $\phi$ Network (Decoder) |         |     |     |      |         |
|--------------------------|---------|-----|-----|------|---------|
| Layer                    | In      | Ker | Str | Act  | Out     |
| FC                       | 2       |     |     | None | 2x2x64  |
| TConv                    | 2x2x64  | 3x3 | 2   | ReLU | 4x4x32  |
| TConv                    | 4x4x32  | 3x3 | 2   | ReLU | 8x8x16  |
| TConv                    | 8x8x16  | 3x3 | 2   | ReLU | 16x16x8 |
| TConv                    | 16x16x8 | 3x3 | 2   | ReLU | 32x32x4 |
| Conv                     | 32x32x4 | 3x3 | 1   | tanh | 32x32x1 |

| Discriminator Network (WGAN and CONGAN) |           |     |     |      |           |
|-----------------------------------------|-----------|-----|-----|------|-----------|
| Layer                                   | In        | Ker | Str | Act  | Out       |
| Conv                                    | 32x32x1   | 3x3 | 1   | ReLU | 32x32x64  |
| Conv                                    | 32x32x64  | 3x3 | 2   | ReLU | 16x16x128 |
| Conv                                    | 16x16x128 | 3x3 | 2   | ReLU | 8x8x256   |
| Conv                                    | 8x8x256   | 3x3 | 2   | ReLU | 4x4x512   |
| FC                                      | 4x4x512   |     |     | None | 1         |

| Read CNN |         |     |     |      |         |
|----------|---------|-----|-----|------|---------|
| Layer    | In      | Ker | Str | Act  | Out     |
| Conv     | 32x32x1 | 5x5 | 1   | ReLU | 32x32x2 |
| Conv     | 32x32x2 | 5x5 | 2   | ReLU | 16x16x4 |
| Conv     | 16x16x4 | 5x5 | 2   | ReLU | 8x8x8   |
| Conv     | 8x8x8   | 5x5 | 2   | ReLU | 4x4x16  |
| Conv     | 4x4x16  | 5x5 | 2   | ReLU | 2x2x32  |
| FC       | 2x2x32  |     |     | tanh | 64      |

| CONGAN Write Network/WGAN Generator |           |     |     |      |           |
|-------------------------------------|-----------|-----|-----|------|-----------|
| Layer                               | In        | Ker | Str | Act  | Out       |
| FC                                  | 64        |     |     | None | 4x4x512   |
| TConv                               | 4x4x512   | 3x3 | 2   | ReLU | 8x8x256   |
| Conv                                | 8x8x256   | 3x3 | 1   | ReLU | 8x8x256   |
| TConv                               | 8x8x256   | 3x3 | 2   | ReLU | 16x16x128 |
| Conv                                | 16x16x128 | 3x3 | 1   | ReLU | 16x16x128 |
| TConv                               | 16x16x128 | 3x3 | 2   | ReLU | 32x32x64  |
| Conv                                | 32x32x64  | 3x3 | 1   | tanh | 32x32x1   |

| Residual Block (Down) |       |          |     |     |      |                                           |
|-----------------------|-------|----------|-----|-----|------|-------------------------------------------|
| ID                    | Layer | In       | Ker | Str | Act  | Out                                       |
| 1                     | Conv  | $axbxc$  | 5x5 | 2   | None | $\frac{a}{2} \times \frac{b}{2} \times d$ |
| 2                     | Conv  | $axbxc$  | 5x5 | 1   | None | $axbxc$                                   |
| 3                     | Norm  | (2)      |     |     |      |                                           |
| 4                     | ReLU  | (3)      |     |     |      |                                           |
| 5                     | Conv  | (4)      | 5x5 | 2   | None | $\frac{a}{2} \times \frac{b}{2} \times d$ |
| 6                     | Add   | (5), (1) |     |     |      |                                           |
| 7                     | Norm  | (6)      |     |     |      |                                           |
| 8                     | ReLU  | (7)      |     |     |      |                                           |

## 2.2. CelebA and Zappos50K Experiments

In this section, we first describe all network architectures used in both the CelebA and Zappos50K experiments. Then we outline the  $\phi$  networks used for each. Here, “Norm” indicates layer norm, “ReLU” indicates the application of a rectified linear unit. The “ID” column is used to identify which layers are used in subsequent operations in the residual block. For the residual blocks, the “In” column is either used to indicate the size of the input or the IDs of the layers used as input. The “Add” layers are simply the addition of the two layers identified in the “In” column with the first ID multiplied by 0.3 before the addition. The “RB $\uparrow$ ” layer is a residual block up and “RB $\downarrow$ ” is a residual block down.

| Discriminator Network |           |     |     |      |           |
|-----------------------|-----------|-----|-----|------|-----------|
| Layer                 | In        | Ker | Str | Act  | Out       |
| Conv                  | 64x64x3   | 3x3 | 1   | ReLU | 64x64x64  |
| RB $\downarrow$       | 64x64x64  |     |     |      | 32x32x128 |
| RB $\downarrow$       | 32x32x128 |     |     |      | 16x16x256 |
| RB $\downarrow$       | 16x16x256 |     |     |      | 8x8x512   |
| RB $\downarrow$       | 8x8x512   |     |     |      | 4x4x512   |
| FC                    | 4x4x512   |     |     | None | 1         |

| Read CNN        |          |     |     |      |          |
|-----------------|----------|-----|-----|------|----------|
| Layer           | In       | Ker | Str | Act  | Out      |
| Conv            | 64x64x3  | 3x3 | 1   | ReLU | 64x64x8  |
| RB $\downarrow$ | 64x64x8  |     |     |      | 32x32x16 |
| RB $\downarrow$ | 32x32x16 |     |     |      | 16x16x32 |
| RB $\downarrow$ | 16x16x32 |     |     |      | 8x8x32   |
| FC              | 8x8x32   |     |     | tanh | 1        |

| CONGAN Write Network/WGAN Generator |           |     |     |      |           |
|-------------------------------------|-----------|-----|-----|------|-----------|
| Layer                               | In        | Ker | Str | Act  | Out       |
| FC                                  | 128       |     |     | ReLU | 4x4x512   |
| RB $\uparrow$                       | 4x4x512   |     |     |      | 8x8x512   |
| RB $\uparrow$                       | 8x8x512   |     |     |      | 16x16x256 |
| RB $\uparrow$                       | 16x16x256 |     |     |      | 32x32x128 |
| RB $\uparrow$                       | 32x32x128 |     |     |      | 64x64x64  |
| Conv                                | 64x64x64  | 3x3 | 1   | tanh | 64x64x3   |

| Residual Block (Up) |       |          |     |     |      |                                   |
|---------------------|-------|----------|-----|-----|------|-----------------------------------|
| ID                  | Layer | In       | Ker | Str | Act  | Out                               |
| 1                   | TConv | $axbxc$  | 5x5 | 2   | None | $(2 * a) \times (2 * b) \times d$ |
| 2                   | Conv  | $axbxc$  | 5x5 | 1   | None | $axbxc$                           |
| 3                   | Norm  | (2)      |     |     |      |                                   |
| 4                   | ReLU  | (3)      |     |     |      |                                   |
| 5                   | TConv | (4)      | 5x5 | 2   | None | $(2 * a) \times (2 * b) \times d$ |
| 6                   | Add   | (5), (1) |     |     |      |                                   |
| 7                   | Norm  | (6)      |     |     |      |                                   |
| 8                   | ReLU  | (7)      |     |     |      |                                   |

## 2.3. CelebA $\phi$ MCNN

The MCNN we developed for the  $\phi$  network in our CelebA experiments takes an image, and puts it through a “base” network. Then the output of the base network is input to twelve “specialized” networks to predict the presence or absence of each of the twelve attributes we used in our experiment. Each of these architectures are outlined below.

| $\phi$ MCNN Network (Base) |          |     |     |      |           |
|----------------------------|----------|-----|-----|------|-----------|
| Layer                      | In       | Ker | Str | Act  | Out       |
| Conv                       | 64x64x3  | 7x7 | 2   | ReLU | 32x32x64  |
| Conv                       | 32x32x64 | 5x5 | 2   | ReLU | 16x16x128 |
| Norm                       |          |     |     |      |           |

| $\phi$ MCNN Network (Specialized) |           |     |     |      |          |
|-----------------------------------|-----------|-----|-----|------|----------|
| Layer                             | In        | Ker | Str | Act  | Out      |
| Conv                              | 16x16x128 | 3x3 | 2   | ReLU | 8x8x256  |
| Conv                              | 8x8x256   | 3x3 | 2   | ReLU | 4x4x512  |
| Norm                              |           |     |     |      |          |
| Conv                              | 4x4x512   | 3x3 | 2   | ReLU | 2x2x1024 |
| FC                                | 2x2x1024  |     |     | sigm | 1        |

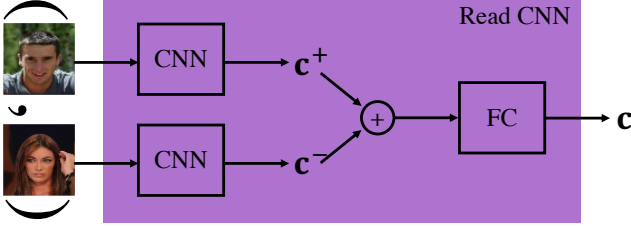

Figure 1: The read network to map a constraint to a vector.

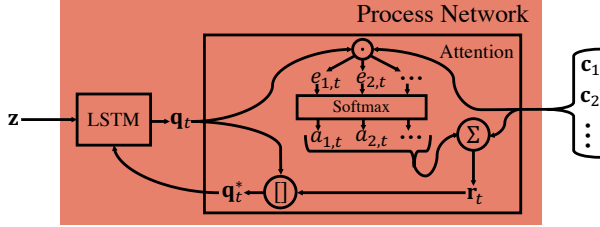

Figure 2: Illustration of the  $t$ th iteration of the process network, beginning with the LSTM unit and ending with  $q_t^*$ .

## 2.4. Zappos50K $\phi$ Triplet Network

A triplet network takes three images and puts them through the same network resulting in an  $n$  dimensional embedding for which standard triplet losses can be applied. Below describes the network we used in our Zappos50K experiments. Note that after each two convolutional layers, layer normalization is applied.

| $\phi$ Triplet Network |          |     |     |      |          |
|------------------------|----------|-----|-----|------|----------|
| Layer                  | In       | Ker | Str | Act  | Out      |
| Conv                   | 64x64x3  | 5x5 | 1   | ReLU | 64x64x8  |
| Conv                   | 64x64x8  | 5x5 | 2   | ReLU | 32x32x8  |
| Conv                   | 32x32x8  | 5x5 | 1   | ReLU | 32x32x16 |
| Conv                   | 32x32x16 | 5x5 | 2   | ReLU | 16x16x16 |
| Conv                   | 16x16x16 | 5x5 | 1   | ReLU | 16x16x32 |
| Conv                   | 16x16x32 | 5x5 | 2   | ReLU | 8x8x32   |
| Conv                   | 8x8x32   | 5x5 | 1   | ReLU | 8x8x64   |
| Conv                   | 8x8x64   | 5x5 | 2   | ReLU | 4x4x64   |
| FC                     | 4x4x64   |     |     | None | 2        |

## 3. CelebA $\phi$ MCNN Training Details and Performance

For training the  $\phi$  MCNN used in the CelebA data experiments, we chose twelve attributes for the network to predict. We used the Adam optimization method with default parameters, a batch size of 32, and trained the model for 100,000 iterations. The test accuracy of the network for the twelve

attributes is shown in the table below. We note that these results are slightly worse than those reported in the original paper, but sufficient for the CONGAN generator to learn how to manipulate images. Performance can be increased by employing the “aux” method described in the original MCNN paper, and by designing the architecture to be take advantage of groups of common attributes.

| Attribute   | Accuracy |
|-------------|----------|
| Bald        | 0.9836   |
| Black Hair  | 0.8870   |
| Blond Hair  | 0.9414   |
| Brown Hair  | 0.8242   |
| Eyeglasses  | 0.9901   |
| Goatee      | 0.9531   |
| Gray Hair   | 0.9709   |
| Male        | 0.9760   |
| Mustache    | 0.9557   |
| No Beard    | 0.9360   |
| Pale Skin   | 0.9601   |
| Wearing Hat | 0.9832   |

## 4. Zappos50K $\phi$ Triplet Network Training Details and Performance

We formed the training set for the triplet network by first taking each image in the Zappos50K train set, and placed it into one of the 64 color histogram bins according to their highest histogram value. To form each triplet  $(A, B, C)$  (“ $A$  is more similar to  $C$  than  $B$ ”), we iterated over each bin  $j$ , selecting images  $A$  and  $B$  randomly from  $j$ , and image  $C$  randomly from another bin. We iterated over each bin 5000 times creating 320,000 triplets for training. We did a similar process for the test set, but with 1000 “passes” over each bin,, making a test set of 64,000 triplets.

We trained the network using default Adam optimization parameters and a batch size of 128. We found that loss leveled out around 25,000 steps and stopped optimization at that point. Upon convergence, the network was able to satisfy 94.504% of the test triplets. Figure 3 shows samples of the Zappos50K data set embedded in two dimensions using the  $\phi$  triplet network.

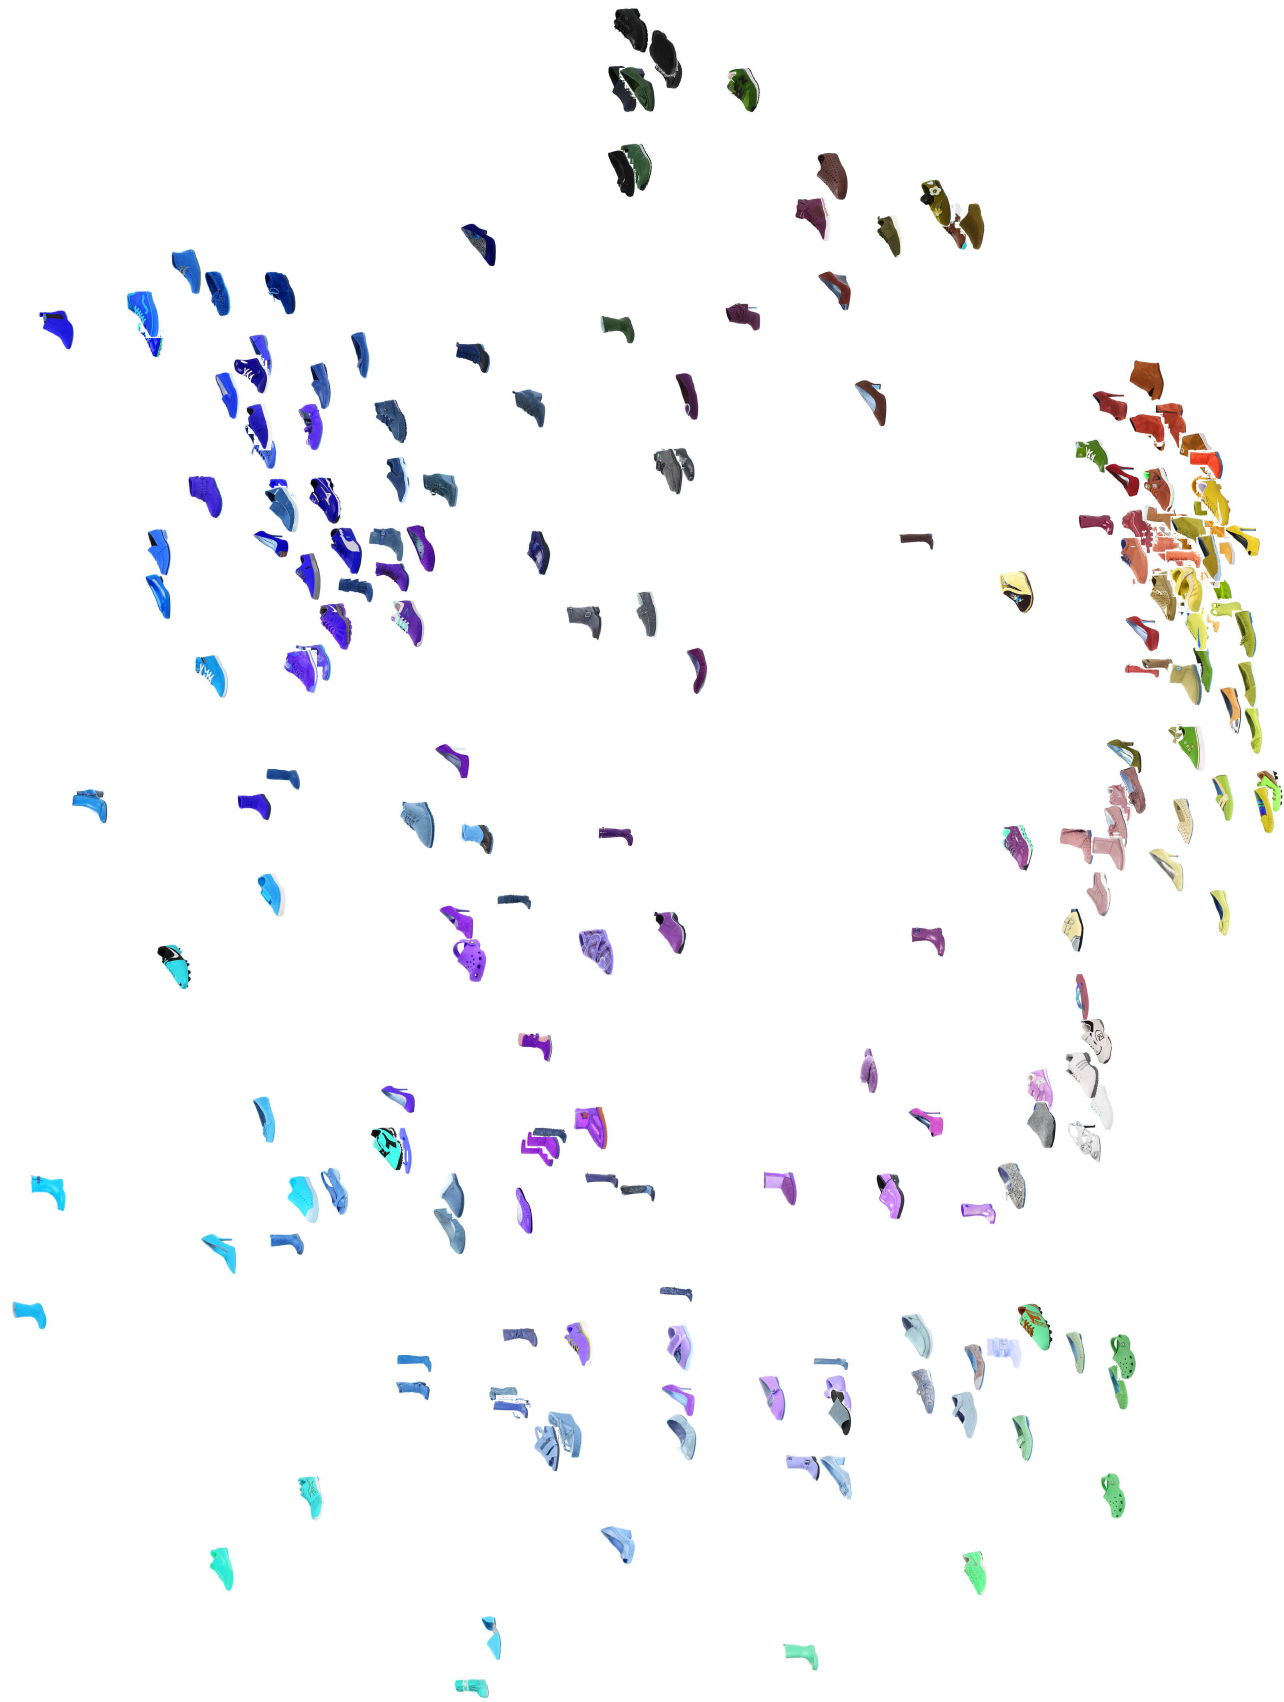

Figure 3: Samples from the Zappos50K data set embedded using the  $\phi$  triplet network.
